# Supplementary material for: The quasi-equilibrium framework re-visited: analyzing long-term CO 2 enrichment responses in plant-soil models
Source: Copernicus journal article supplement (doi:10.5194/gmd-2018-291), 2018-12-07
Supplement: Supplementary file 1 [file gmd-2018-291-supplement.pdf]

## ***Supplementary Materials***

Article title: The quasi-equilibrium framework re-visited: analyzing long-term CO<sub>2</sub> enrichment responses in plant-soil models

Authors: M. Jiang, S. Zaehle, M.G. De Kauwe, A.P. Walker, S. Caldararu, D.S. Ellsworth, & B.E. Medlyn

The following Supporting Information is available for this article:

**Figure S1** Illustration of effect of allocation flexibility on plant response to elevated CO<sub>2</sub> and nitrogen deposition.

**Figure S2** Sensitivity test of varying N uptake parameters on CO<sub>2</sub> fertilization effect.

**Figure S3** Sensitivity test of varying priming effect parameters on the M-term CO<sub>2</sub> fertilization effect.

**Table S1** Relationship of NPP and leaching N rate at different timescales

**Table S1** Relationship of NPP ( $\text{kg m}^{-2} \text{yr}^{-1}$ ) and leaching N rate ( $N_{\text{loss}}$ ,  $\text{kg m}^{-2} \text{yr}^{-1}$ ) at different timescales, assuming explicit mineral N pool. VL400 is the very long term timescale under  $\text{CO}_2 = 400$  ppm, and  $M_{800}$ ,  $L_{800}$  and  $VL_{800}$  are medium, long, and very long term equilibrium point under  $\text{CO}_2 = 800$  ppm. Leaching rate is assumed at  $0.05 \text{ yr}^{-1}$ , which is assumed to be the sum of all N lost from the system (i.e. leaching, denitrification, etc.). Detailed derivations and assumptions provided in Section 3.2 of the manuscript.

| Timescale  | NPP ( $\text{kg m}^{-2} \text{yr}^{-1}$ ) | $N_{\text{loss}}$ ( $\text{kg m}^{-2} \text{yr}^{-1}$ ) |
|------------|-------------------------------------------|---------------------------------------------------------|
| VL400      | 1.68                                      | 0.4                                                     |
| $M_{800}$  | 1.79                                      | 0.23                                                    |
| $L_{800}$  | 1.90                                      | 0.395                                                   |
| $VL_{800}$ | 1.91                                      | 0.4                                                     |

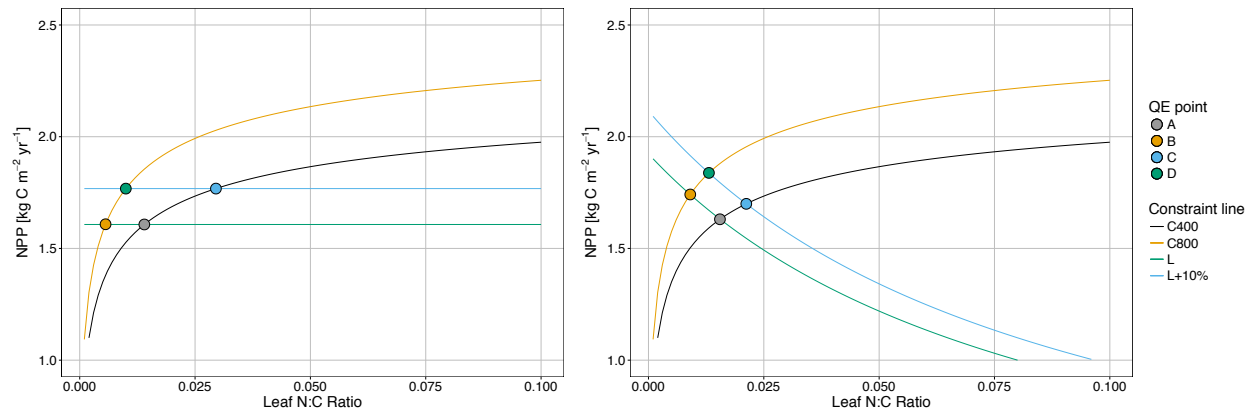

**Figure S1** Illustration of effect of allocation flexibility on plant response to elevated  $\text{CO}_2$  and nitrogen deposition, with a) as no coupling between allocation of leaf and wood, and b) linear coupling between leaf and wood allocation. No coupling assumes that allocation to wood ( $a_w$ ) = 0.6, and allocation to leaf ( $a_f$ ) = 0.2. Linear coupling assumes the same  $a_f$ , but  $a_w = 3a_f$ . The detailed derivations are shown in Medlyn and Dewar (1996). C400 and C800 are the photosynthetic constraint curves at  $\text{CO}_2 = 400$  ( $a\text{CO}_2$ ) and 800 ppm ( $e\text{CO}_2$ ), respectively. L and L+10% are the long-term soil recycling constraint under ambient and ambient + 10% nitrogen deposition rate. Point A is the equilibrium point between C400 and L, point B is the equilibrium point between C800 and L, C is equilibrium point between C400 and L+10%, and D is equilibrium point between C800 and L+10%. The graph shows that linear coupling of  $a_f$  and  $a_w$  resulted in more responsive NPP to  $e\text{CO}_2$  even if N deposition does not change, whereas no coupling between  $a_f$  and  $a_w$  has no effect of  $\text{CO}_2$  on production, unless N deposition increases.

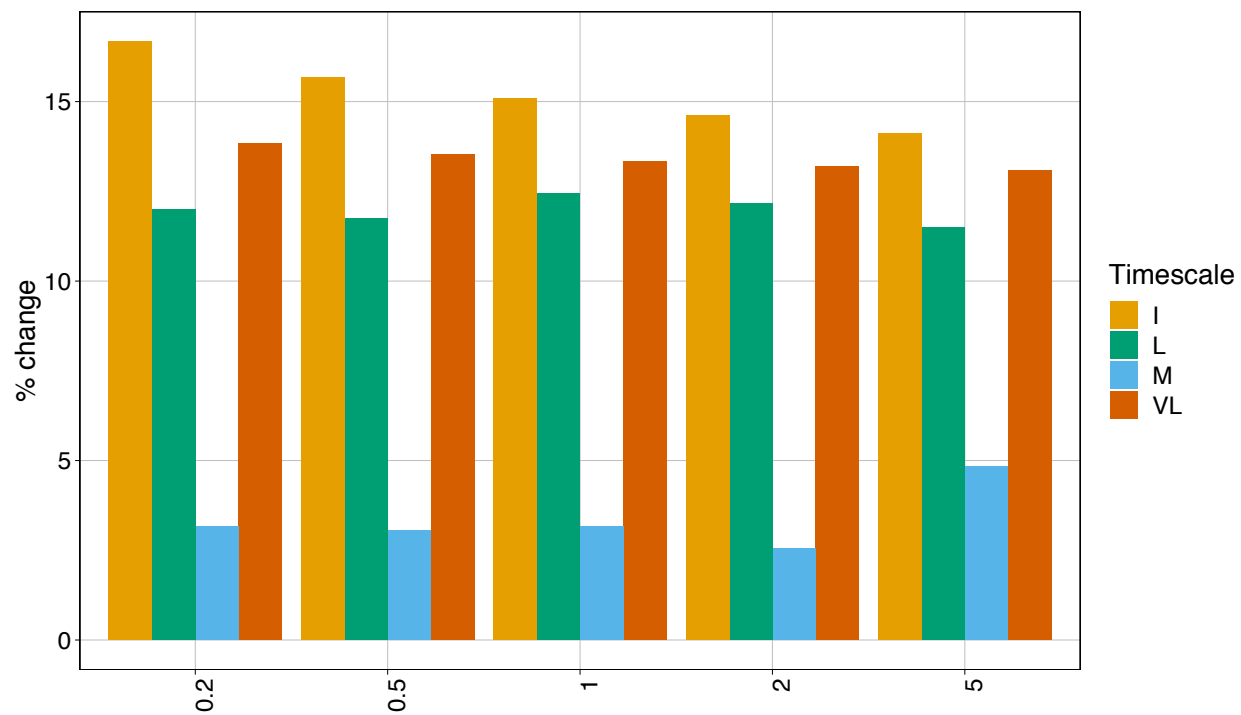

**Figure S2** Sensitivity test of varying nitrogen uptake coefficient on the CO<sub>2</sub> fertilization effect (% change) at various equilibrium points. Nitrogen uptake coefficient are 0.2, 0.5, 1, 2 and 5 yr<sup>-1</sup>. I: instantaneous, M: medium term, L: long term, VL: very long term.

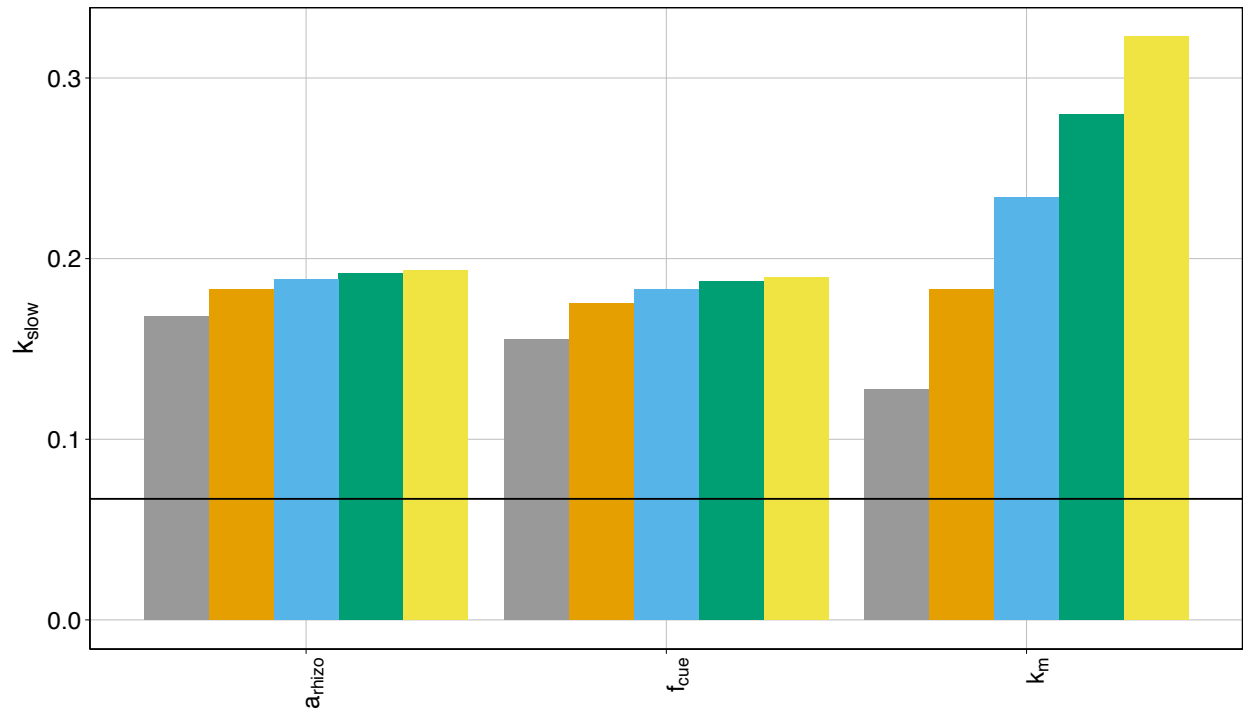

**Figure S3** Sensitivity test of varying priming effect parameters on the decomposition rate of slow soil organic matter pool ( $k_{slow}$ ). Parameters varied are allocation coefficient to rhizosphere ( $a_{rhizo}$ ), microbial carbon use efficiency ( $f_{cue}$ ), and scaling factor ( $k_m$ ). From left to right, value ranges are: 0.1, 0.2, 0.3, 0.4, and 0.5 for  $a_{rhizo}$ , 0.1, 0.2, 0.3, 0.4, and 0.5 for  $f_{cue}$ , and 1, 2, 3, 4, 5 for  $k_m$ . Default values are, Black horizontal line is the existing  $k_{slow}$  value, before introducing priming effect.
